# Supplementary material for: Correction: Co-Evolution of Mitochondrial tRNA Import and Codon Usage Determines Translational Efficiency in the Green Alga Chlamydomonas
Source: PubMed Central journal article supplement (PMC7108720; doi:10.1371/journal.pgen.1008719), 2020-03-31

**S1 File.** Original image data supporting Figures 1B, 1D and 5A

**Figure 1B**

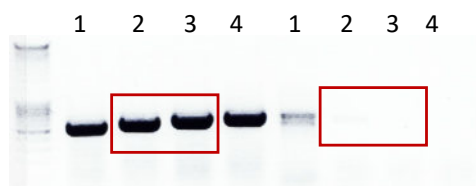

**Figure 1D**

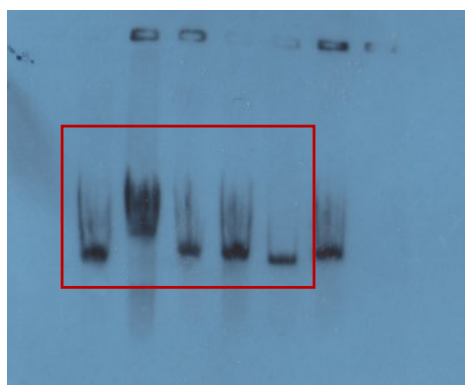

**Figure 5A**

**Input**

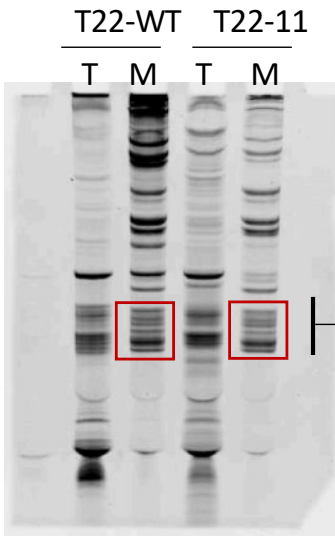

— Loading  
tRNA

T: Total extract  
M: Mitochondrial extract

□ Indicates images used for figure 5A

**Northern blots**

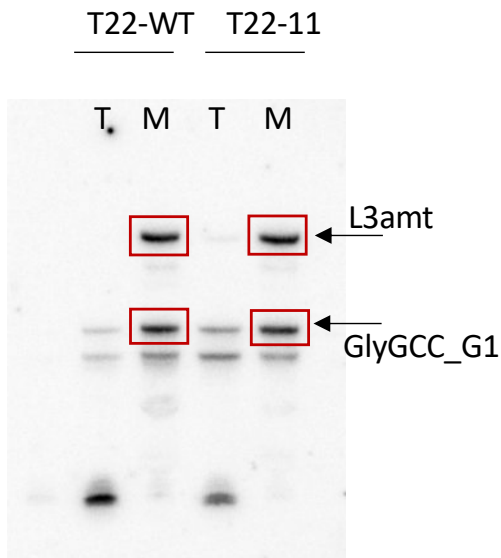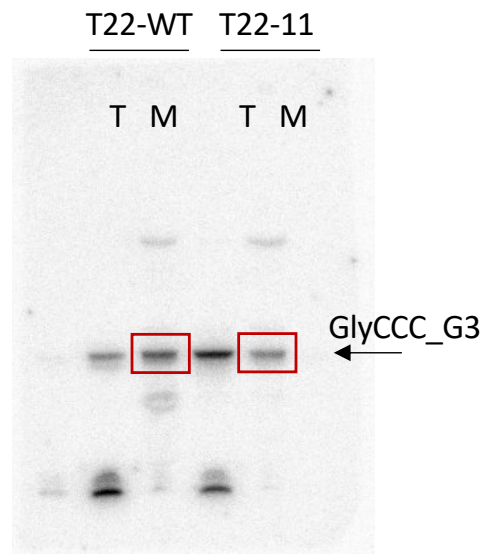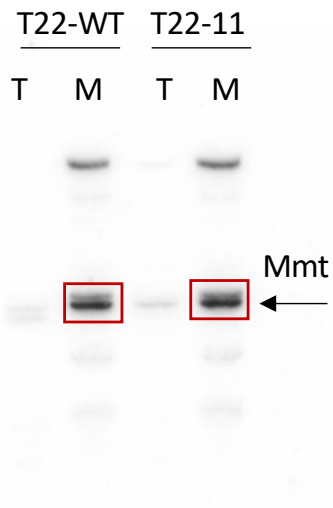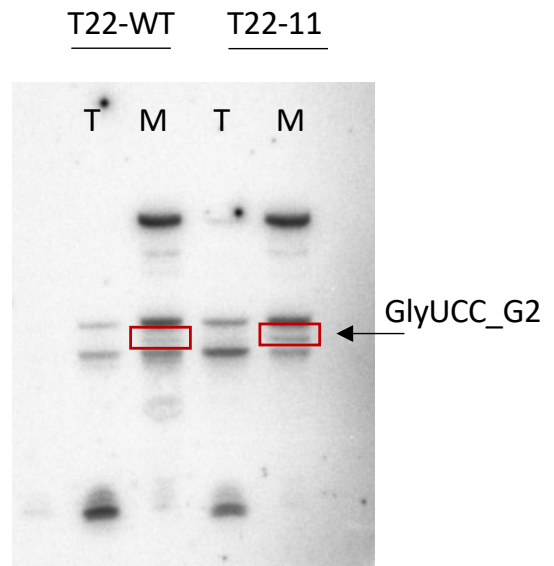

Figure 5A

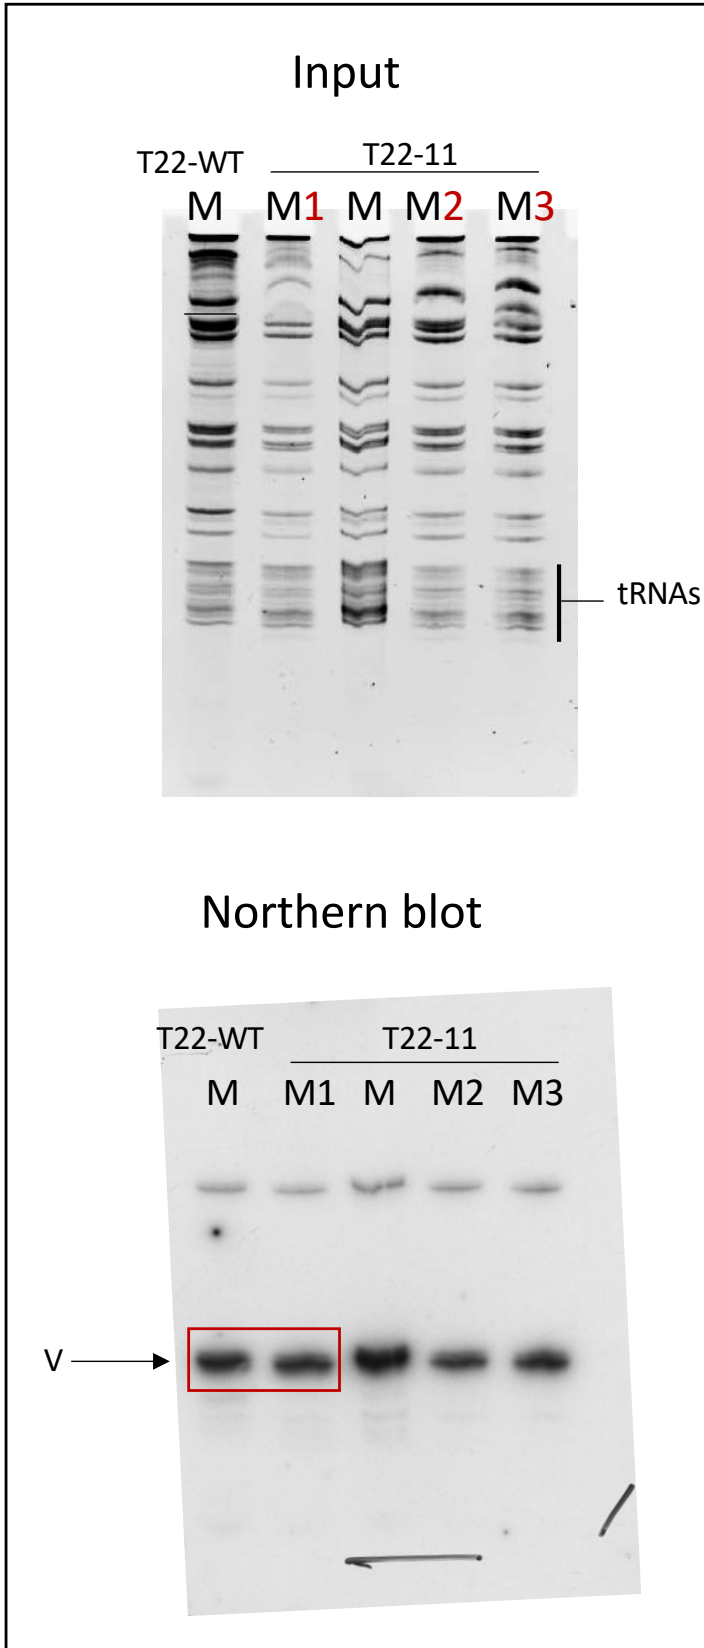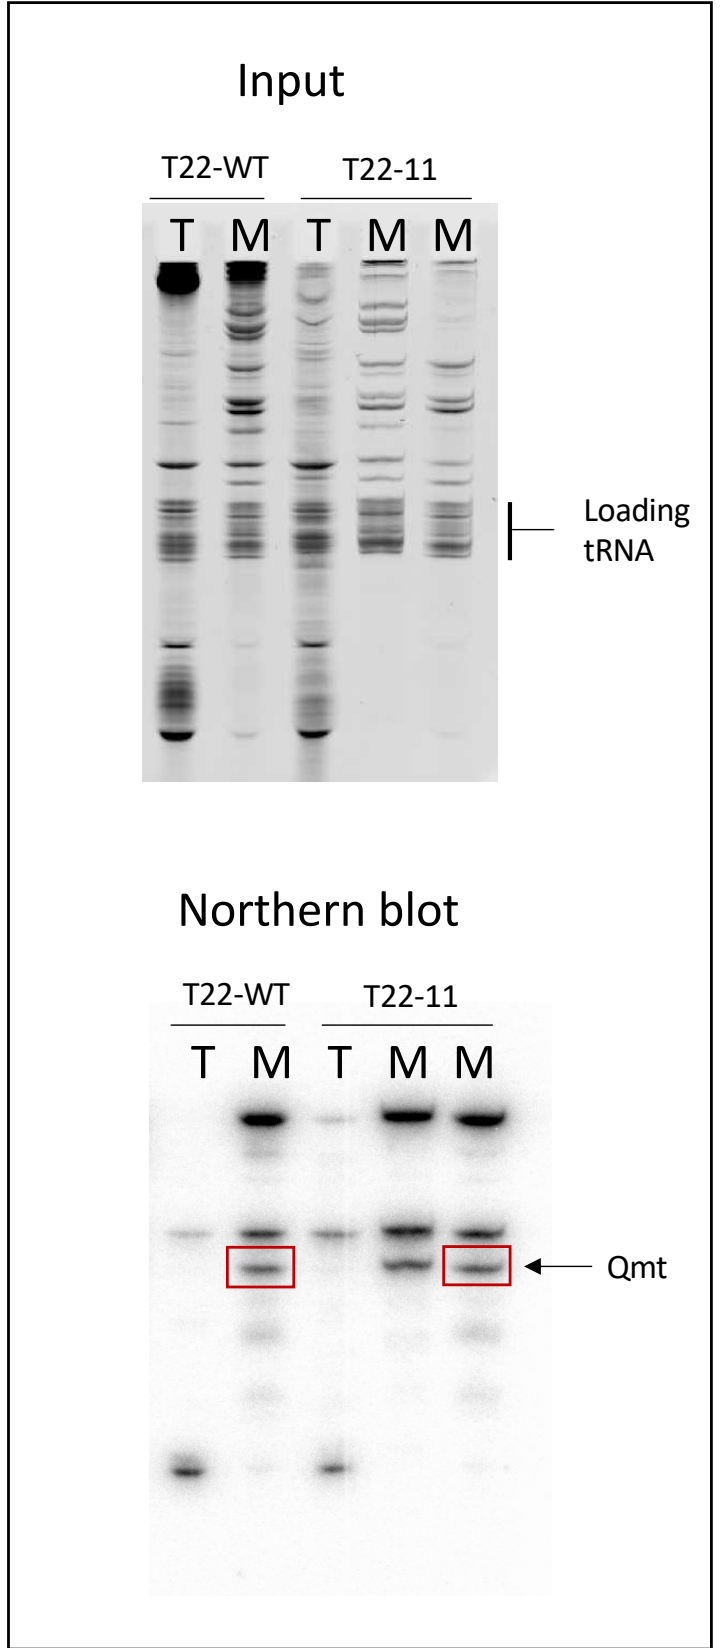

## Input

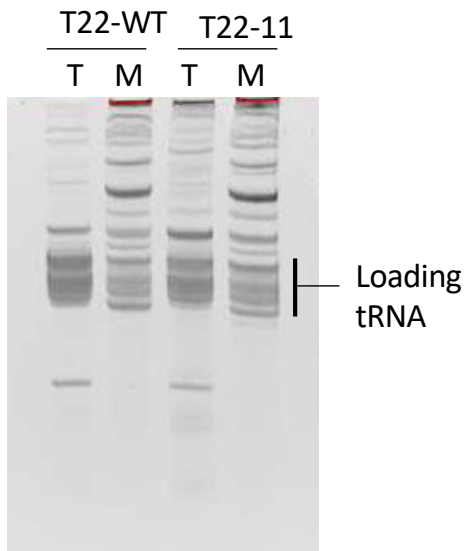

## Northern blot

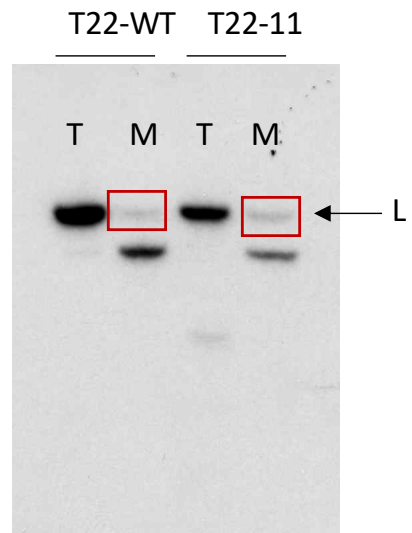

Supplement: pgen.1008719.s001.pdf [file pgen.1008719.s001.pdf]
