# Supplementary material for: Correction: Co-Evolution of Mitochondrial tRNA Import and Codon Usage Determines Translational Efficiency in the Green Alga Chlamydomonas
Source: PubMed Central journal article supplement (PMC7108720; doi:10.1371/journal.pgen.1008719), 2020-03-31
Supplement: pgen.1008719.s002.pdf [file pgen.1008719.s002.pdf]

S2 File: Quantitative data supporting Figure 5B.

Probe\_61-BI.020911

Bl.2.9.11 sd61+1050

| NO.      | Index | PSL    |
|----------|-------|--------|
| MtT22-WT | U1    | 330,3  |
| MtT22-11 | U2    | 317,58 |
| MtT22-WT | U3    | 2892,7 |
| MtT22-11 | U4    | 1729,8 |

|          | 61     | 1050   | sd/1050 |       | Log2   | %     |
|----------|--------|--------|---------|-------|--------|-------|
| MtT22-WT | 2892,7 | 330,3  | 8,758   | 1,000 | 0,000  | 100,0 |
| MtT22-11 | 1729,8 | 317,58 | 5,447   | 0,622 | -0,685 | 62,2  |

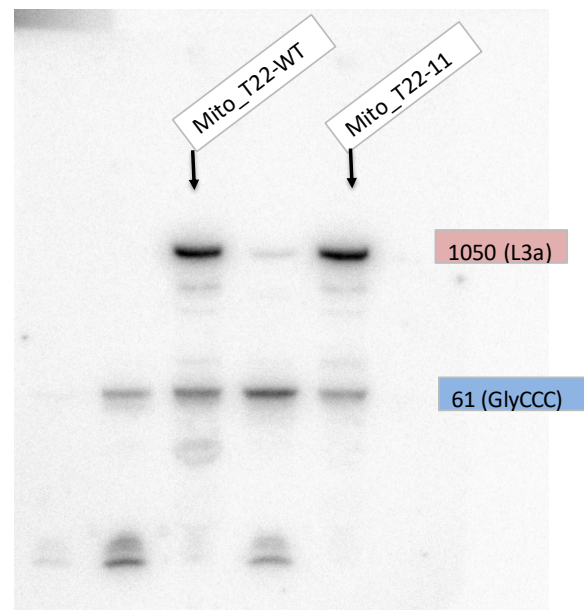

Probe\_63-BI.020911

| NO.      | Index | PSL    |      |
|----------|-------|--------|------|
| MtT22-WT | U1    | 1182,3 | 1050 |
| MtT22-11 | U2    | 1168,4 |      |
| MtT22-WT | U3    | 218,2  | 63   |
| MtT22-11 | U4    | 286    |      |
| MtT22-WT | U5    | 647,4  | 62   |
| MtT22-11 | U6    | 660,6  |      |
|          |       |        | 61   |

|          | 63    | 1050   | sd/1050 |       | Log2  | %     |
|----------|-------|--------|---------|-------|-------|-------|
| MtT22-WT | 218,2 | 1182,3 | 0,185   | 1,000 | 0,000 | 100,0 |
| MtT22-11 | 286   | 1168,4 | 0,245   | 1,326 | 0,407 | 132,6 |

  

|          | 62    | 1050   | sd/1050 |       | Log2  | %     |
|----------|-------|--------|---------|-------|-------|-------|
| MtT22-WT | 647,4 | 1182,3 | 0,548   | 1,000 | 0,000 | 100,0 |
| MtT22-11 | 660,6 | 1168,3 | 0,565   | 1,033 | 0,046 | 103,3 |

BI.2-09-11\_sd63-2.TIFF

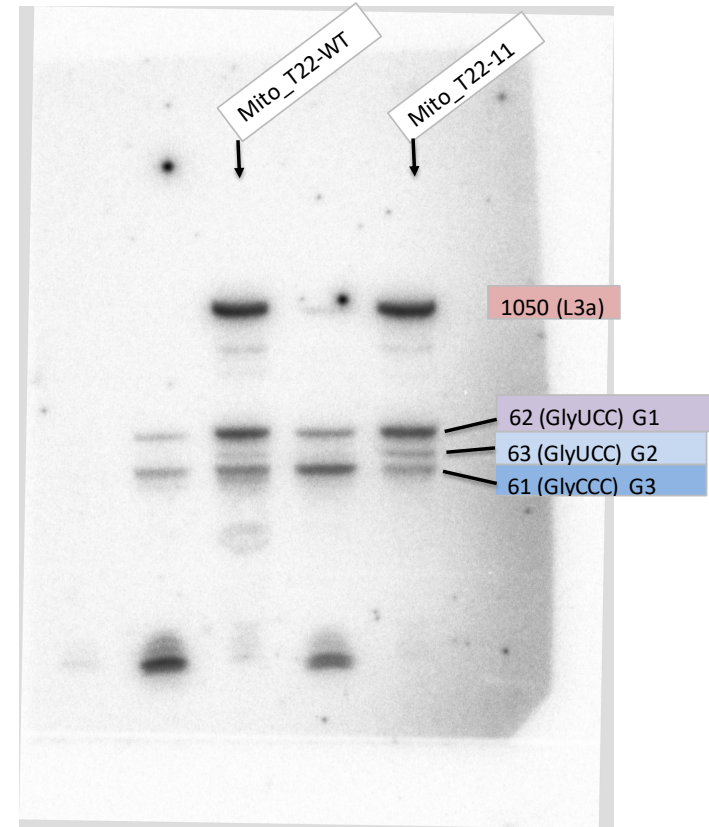

Probe\_62-61-BI.020911

| NO.      | Index | PSL    |      |
|----------|-------|--------|------|
| MtT22-WT | U1    | 1738,1 | 1050 |
| MtT22-11 | U2    | 1762,5 |      |
| MtT22-WT | U3    | 1434,1 | 62   |
| MtT22-11 | U4    | 1427   |      |
| MtT22-WT | U5    | 729    | 61   |
| MtT22-11 | U6    | 588    |      |

Bl.2.9.11 sd62-61

|          | 61  | 1050   | sd/1050 |       | Log2   | %     |
|----------|-----|--------|---------|-------|--------|-------|
| MtT22-WT | 729 | 1738,1 | 0,419   | 1,000 | 0,000  | 100,0 |
| MtT22-11 | 588 | 1762,5 | 0,334   | 0,795 | -0,330 | 79,5  |

  

|          | 62     | 1050   | sd/1050 |       | Log2   | %     |
|----------|--------|--------|---------|-------|--------|-------|
| MtT22-WT | 1434,1 | 1738,1 | 0,825   | 1,000 | 0,000  | 100,0 |
| MtT22-11 | 1427   | 1762,5 | 0,810   | 0,981 | -0,027 | 98,1  |

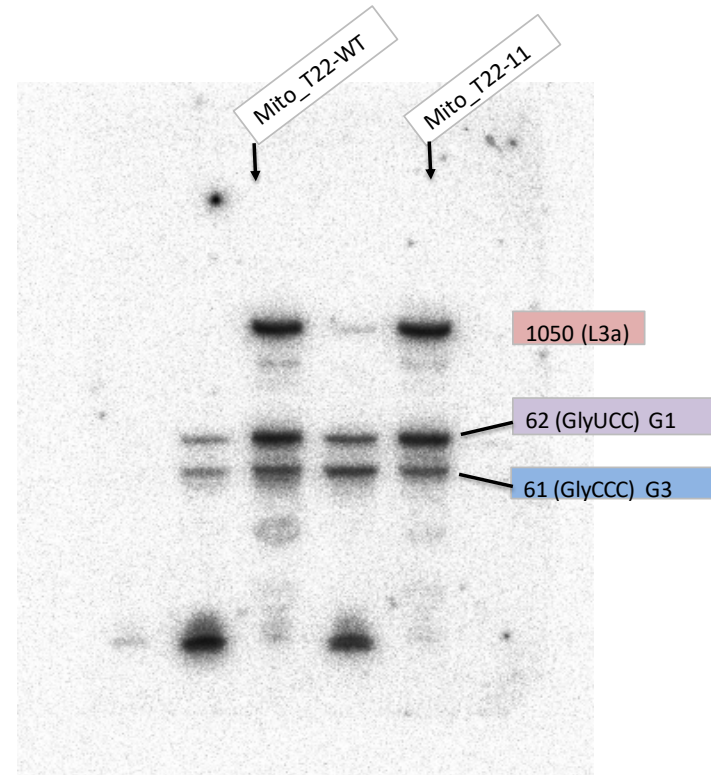

Probe\_832-831-BI.020911

| NO.      | Index | PSL    |      |
|----------|-------|--------|------|
| MtT22-WT | U1    | 1622,2 | 1050 |
| MtT22-11 | U2    | 1830,4 |      |
| MtT22-WT | U3    | 3602,6 | 831  |
| MtT22-11 | U4    | 3883   |      |
| MtT22-WT | U5    | 1788   | 832  |
| MtT22-11 | U6    | 2045,2 |      |

Bl.2.9.11sd-831-832

|          | 831    | 1050   | sd/1050 |       | Log2   | %     |
|----------|--------|--------|---------|-------|--------|-------|
| MtT22-WT | 3602,6 | 1622,2 | 2,221   | 1,000 | 0,000  | 100,0 |
| MtT22-11 | 3883   | 1830,4 | 2,121   | 0,955 | -0,066 | 95,5  |

  

|          | 832    | 1050   | sd/1050 |       | Log2  | %     |
|----------|--------|--------|---------|-------|-------|-------|
| MtT22-WT | 1788   | 1622,2 | 1,102   | 1,000 | 0,000 | 100,0 |
| MtT22-11 | 2045,2 | 1830,4 | 1,117   | 1,014 | 0,020 | 101,4 |

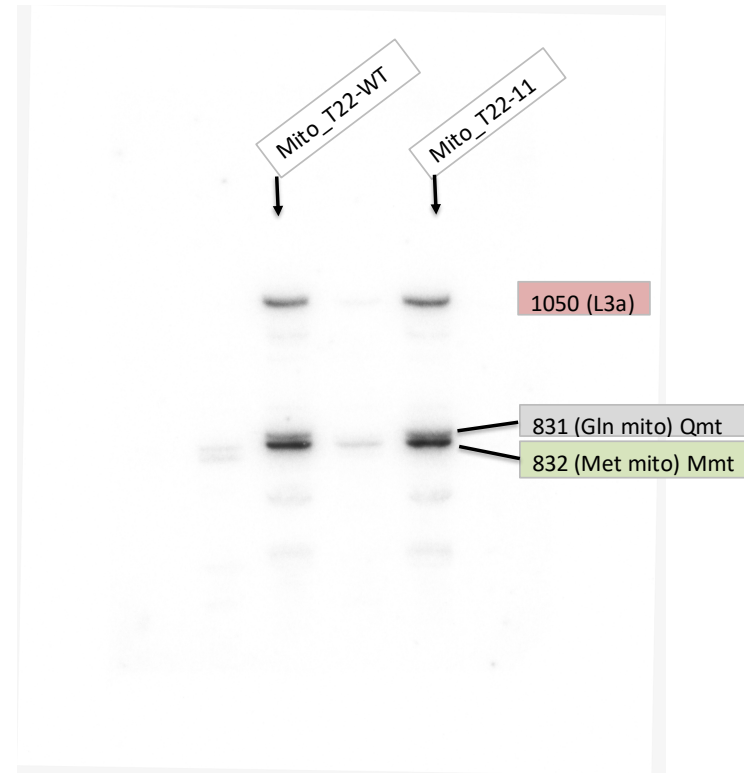



Probe\_884-BI.020911

| NO.      | Index | PSL     |      |
|----------|-------|---------|------|
| MtT22-WT | U1    | 1484    | 1050 |
| MtT22-11 | U2    | 1605    |      |
| MtT22-WT | U3    | 13522,7 | 884  |
| MtT22-11 | U4    | 13495,5 |      |

BI.2-09-11\_sd884

|          | 884 (2) | 1050 | sd/1050 |       | Log2   | %     |
|----------|---------|------|---------|-------|--------|-------|
| MtT22-WT | 13522,7 | 1484 | 9,112   | 1,000 | 0,000  | 100,0 |
| MtT22-11 | 13495,5 | 1605 | 8,408   | 0,923 | -0,116 | 92,3  |

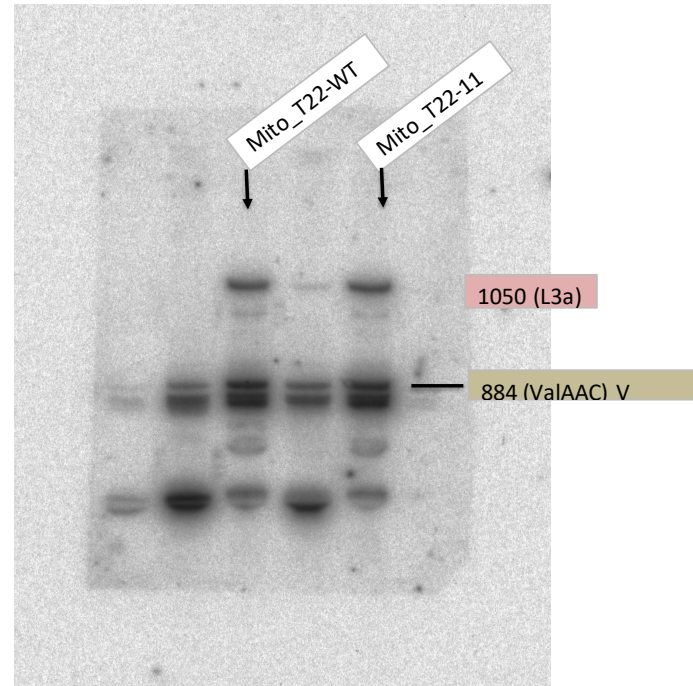

Probe\_958-BI.020911

| NO.      | Index | PSL    |      |
|----------|-------|--------|------|
| MtT22-WT | U1    | 393,28 | 1050 |
| MtT22-11 | U2    | 424,94 |      |
| MtT22-WT | U3    | 373,47 | 958  |
| MtT22-11 | U4    | 308,63 |      |

|          | 958    | 1050   | sd/1050 |       | Log2   | %     |
|----------|--------|--------|---------|-------|--------|-------|
| MtT22-WT | 373,47 | 393,28 | 0,950   | 1,000 | 0,000  | 100,0 |
| MtT22-11 | 308,63 | 424,94 | 0,726   | 0,765 | -0,387 | 76,5  |

phosphoimager with probe 958 LeuAAG not found and the scan is provided

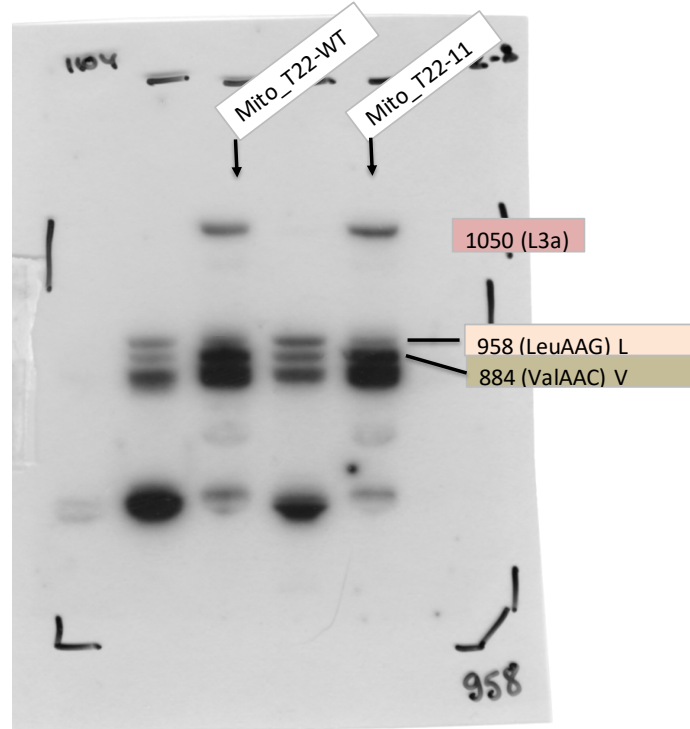

Results-BI.020911

| MtT22-11 | 61   | 63    | 832-831 | 62-61 | 884  | 958  | AV | SD    |
|----------|------|-------|---------|-------|------|------|----|-------|
| 61       | 62,2 |       |         |       |      |      |    | 62,2  |
| 62       |      | 103,3 |         | 98,1  |      |      |    | 100,7 |
| 63       |      | 132,6 |         |       |      |      |    | 132,6 |
| 884      |      |       |         |       | 92,3 |      |    | 92,3  |
| 958      |      |       |         |       |      | 76,5 |    | 76,5  |
| 832      |      |       | 101,4   |       |      |      |    | 101,4 |
| 831      |      |       | 95,5    |       |      |      |    | 95,5  |

Probe\_831-832-BI.080911

| NO.        | Index | PSL    |      |
|------------|-------|--------|------|
| MtT22-WT   | U1    | 57,4   | 1050 |
| MtT22-11-1 | U2    | 50,6   |      |
| MtT22-11-3 | U4    | 61,8   |      |
| MtT22-WT   | U5    | 1483,2 | 832  |
| MtT22-11-1 | U6    | 1634,7 |      |
| MtT22-11-3 | U8    | 1837,5 |      |
| MtT22-WT   | U9    | 2635,2 | 831  |
| MtT22-11-1 | U10   | 2498,4 |      |
| MtT22-11-3 | U12   | 2419,6 |      |

Bl.8.9.11sd831-2

|            | 832    | 1050 | sd/1050 |       | Log2  | %     |
|------------|--------|------|---------|-------|-------|-------|
| MtT22-WT   | 1483,2 | 57,4 | 25,840  | 1,000 | 0,000 | 100,0 |
| MtT22-11-1 | 1634,7 | 50,6 | 32,306  | 1,250 | 0,322 | 125,0 |
| MtT22-11-3 | 1837,5 | 61,8 | 29,733  | 1,151 | 0,202 | 115,1 |

  

|            | 831    | 1050 | sd/1050 |       | Log2   | %     |
|------------|--------|------|---------|-------|--------|-------|
| MtT22-WT   | 2635,2 | 57,4 | 45,909  | 1,000 | 0,000  | 100,0 |
| MtT22-11-1 | 2498,4 | 50,6 | 49,375  | 1,075 | 0,105  | 107,5 |
| MtT22-11-3 | 2419,6 | 61,8 | 39,152  | 0,853 | -0,230 | 85,3  |

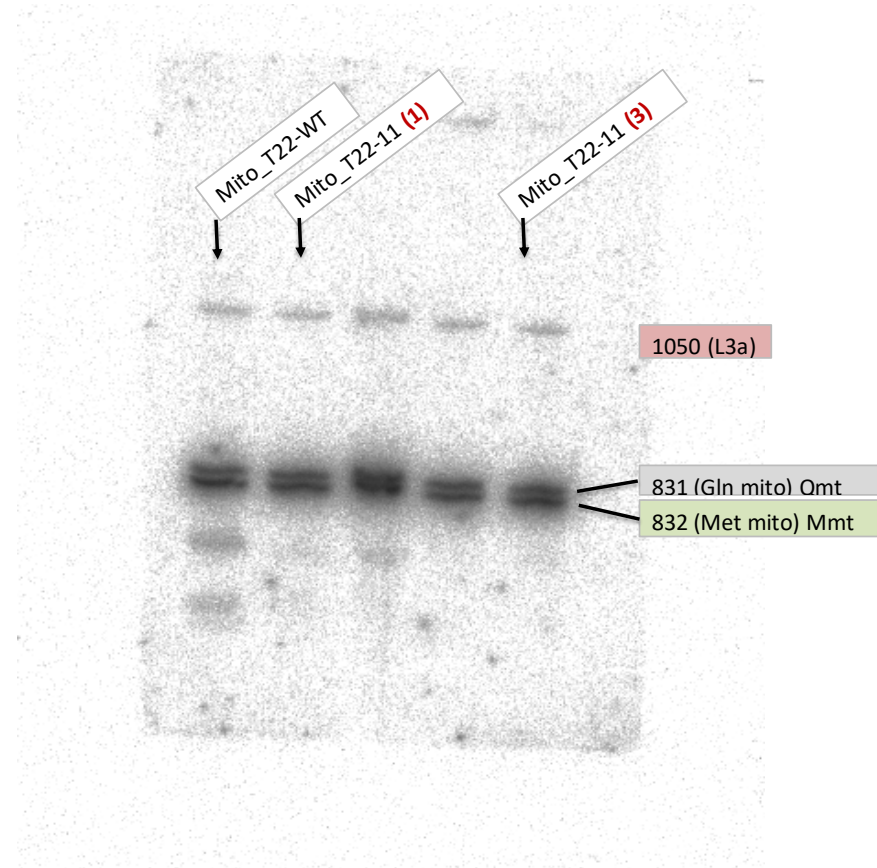

Probe\_884-BI.080911

| NO.        | Index | PSL     |      |
|------------|-------|---------|------|
| MtT22-WT   | U1    | 222,36  | 1150 |
| MtT22-11-1 | U2    | 177,68  |      |
| MtT22-11-3 | U4    | 224,11  |      |
| MtT22-WT   | U5    | 2000,7  | 884  |
| MtT22-11-1 | U6    | 1848,04 |      |
| MtT22-11-3 | U8    | 1871,8  |      |

phosphoimager not found and the scan is provided

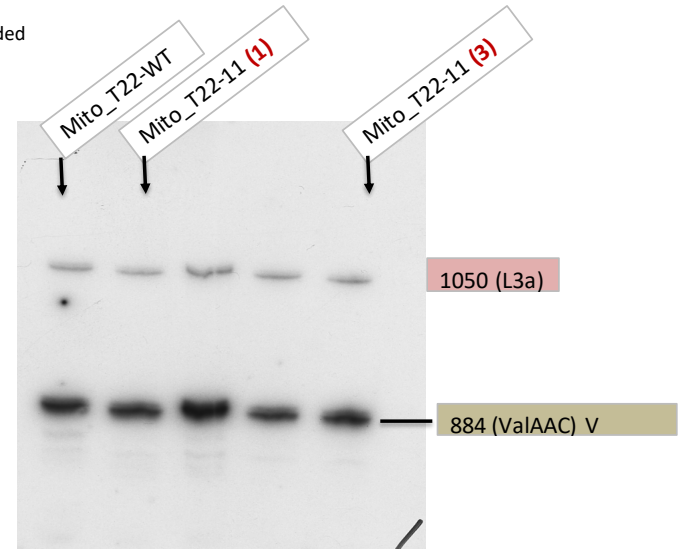

|            | 884     | 1050   | sd/1050 |       | Log2   | %     |
|------------|---------|--------|---------|-------|--------|-------|
| MtT22-WT   | 2000,7  | 222,36 | 8,998   | 1,000 | 0,000  | 100,0 |
| MtT22-11-1 | 1848,04 | 177,68 | 10,401  | 1,156 | 0,209  | 115,6 |
| MtT22-11-3 | 1871,8  | 224,11 | 8,352   | 0,928 | -0,107 | 92,8  |

Probe\_958-BI.080911

| NO.        | Index | PSL    |      |
|------------|-------|--------|------|
| MtT22-WT   | U1    | 234,32 | 1150 |
| MtT22-11-1 | U2    | 194,37 |      |
| MtT22-11-3 | U4    | 227,95 |      |
| MtT22-WT   | U5    | 126,9  | 958  |
| MtT22-11-1 | U6    | 100,47 |      |
| MtT22-11-3 | U8    | 95,69  |      |

|            | 958    | 1050   | sd/1050 |       | Log2   | %     |
|------------|--------|--------|---------|-------|--------|-------|
| MtT22-WT   | 126,9  | 234,32 | 0,542   | 1,000 | 0,000  | 100,0 |
| MtT22-11-1 | 100,47 | 194,37 | 0,517   | 0,954 | -0,067 | 95,4  |
| MtT22-11-3 | 95,69  | 227,95 | 0,420   | 0,775 | -0,367 | 77,5  |

Results-BI.080911

| MtT22-11 | series_1 | series_3 |  | AV    | SD   |
|----------|----------|----------|--|-------|------|
| 831      | 107,5    | 85,3     |  | 96,4  | 15,7 |
| 832      | 125,0    | 115,1    |  | 120,0 | 7,0  |
| 884      | 115,6    | 71,5     |  | 93,6  | 31,2 |
| 958      | 95,4     | 70,5     |  | 83,0  | 17,6 |

Probe\_62-BI.210611

| NO.      | Index | PSL     |
|----------|-------|---------|
| MtT22-WT | U2    | 4647,37 |
| MtT22-11 | U3    | 5698,78 |
| MtT22-WT | U8    | 9442,08 |
| MtT22-11 | U9    | 8848,49 |

|          | 62      | 1050    | sd/1050 |       | Log2  | %     |
|----------|---------|---------|---------|-------|-------|-------|
| MtT22-WT | 4647,37 | 9442,08 | 0,492   | 1,000 | 0,000 | 100,0 |
| MtT22-11 | 5698,78 | 8848,49 | 0,644   | 1,308 | 0,388 | 130,8 |

sd62 bl.21.6.11

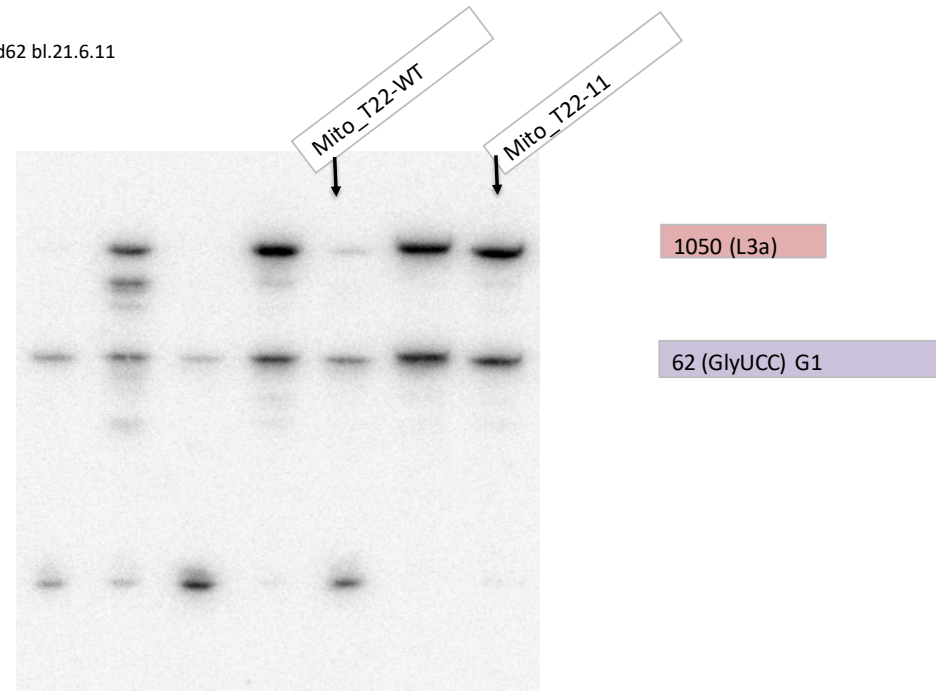



Probe\_831-BI.210611

| NO.      | Index | PSL     |
|----------|-------|---------|
| MtT22-WT | U2    | 1534,54 |
| MtT22-11 | U3    | 1742,81 |
| MtT22-WT | U8    | 6539,88 |
| MtT22-11 | U9    | 6395,12 |
| MtT22-WT | U14   | 2224,02 |
| MtT22-11 | U15   | 2752,26 |

sd831 bl.21.6.11

|          | 62      | 1050    | sd/1050 |       | Log2  | %     |
|----------|---------|---------|---------|-------|-------|-------|
| MtT22-WT | 2224,02 | 6539,88 | 0,340   | 1,000 | 0,000 | 100,0 |
| MtT22-11 | 2752,26 | 6395,12 | 0,430   | 1,266 | 0,340 | 126,6 |

|          | 831     | 1050    | sd/1050 |       | Log2  | %     |
|----------|---------|---------|---------|-------|-------|-------|
| MtT22-WT | 1534,54 | 6539,88 | 0,235   | 1,000 | 0,000 | 100,0 |
| MtT22-11 | 1742,81 | 6395,12 | 0,273   | 1,161 | 0,216 | 116,1 |

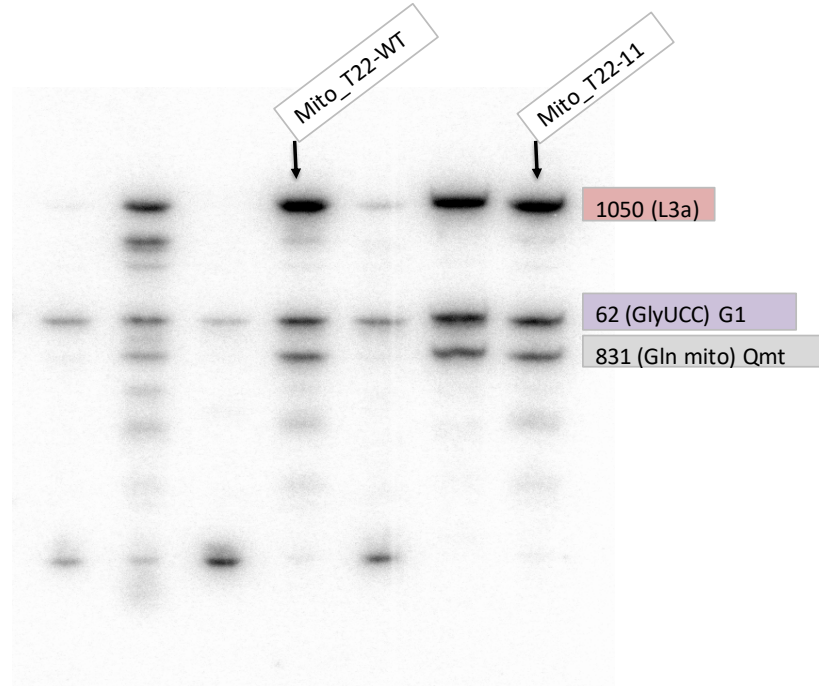

Probe\_61-BI.210611

| NO.      | Index | PSL    |
|----------|-------|--------|
| MtT22-WT | U1    | 445,4  |
| MtT22-11 | U2    | 376    |
| MtT22-WT | U3    | 1853,5 |
| MtT22-11 | U4    | 1125   |

Bl. 21.6.11 sd61

|          | 61     | 1050  | sd/1050 |       | Log2   | %     |
|----------|--------|-------|---------|-------|--------|-------|
| MtT22-WT | 1853,5 | 445,4 | 4,161   | 1,000 | 0,000  | 100,0 |
| MtT22-11 | 1125   | 376   | 2,992   | 0,719 | -0,476 | 71,9  |

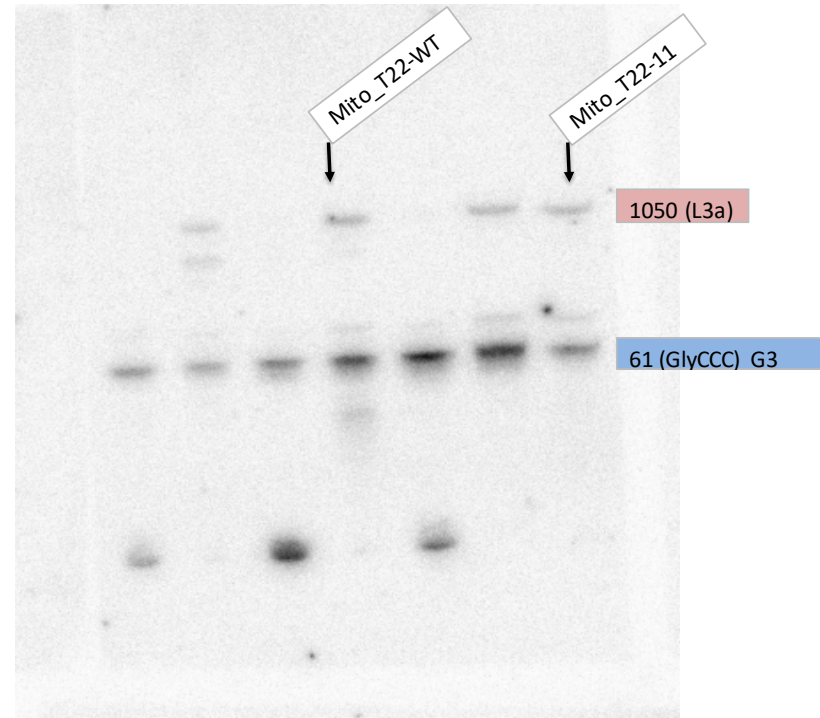

Probe\_63-BI.210611

| NO.      | Index | PSL    |      |
|----------|-------|--------|------|
| MtT22-WT | U1    | 420,5  | 1050 |
| MtT22-11 | U2    | 356,6  |      |
| MtT22-WT | U3    | 432,2  | 63   |
| MtT22-11 | U4    | 424,1  |      |
| MtT22-WT | U5    | 864,5  | 62?  |
| MtT22-11 | U6    | 1107,8 |      |
| MtT22-WT | U7    | 1230   | 61   |
| MtT22-11 | U8    | 730,5  |      |

Bl.21.6.11 sd63

|          | 63    | 1050  | sd/1050 |       | Log2  | %     |
|----------|-------|-------|---------|-------|-------|-------|
| MtT22-WT | 432,2 | 420,5 | 1,028   | 1,000 | 0,000 | 100,0 |
| MtT22-11 | 424,1 | 356,6 | 1,189   | 1,157 | 0,211 | 115,7 |

  

|          | 62     | 1050  | sd/1050 |       | Log2  | %     |
|----------|--------|-------|---------|-------|-------|-------|
| MtT22-WT | 864,5  | 420,5 | 2,056   | 1,000 | 0,000 | 100,0 |
| MtT22-11 | 1107,8 | 356,6 | 3,107   | 1,511 | 0,596 | 151,1 |

  

|          | 61    | 1050  | sd/1050 |       | Log2   | %     |
|----------|-------|-------|---------|-------|--------|-------|
| MtT22-WT | 1230  | 420,5 | 2,925   | 1,000 | 0,000  | 100,0 |
| MtT22-11 | 730,5 | 356,6 | 2,049   | 0,700 | -0,514 | 70,0  |

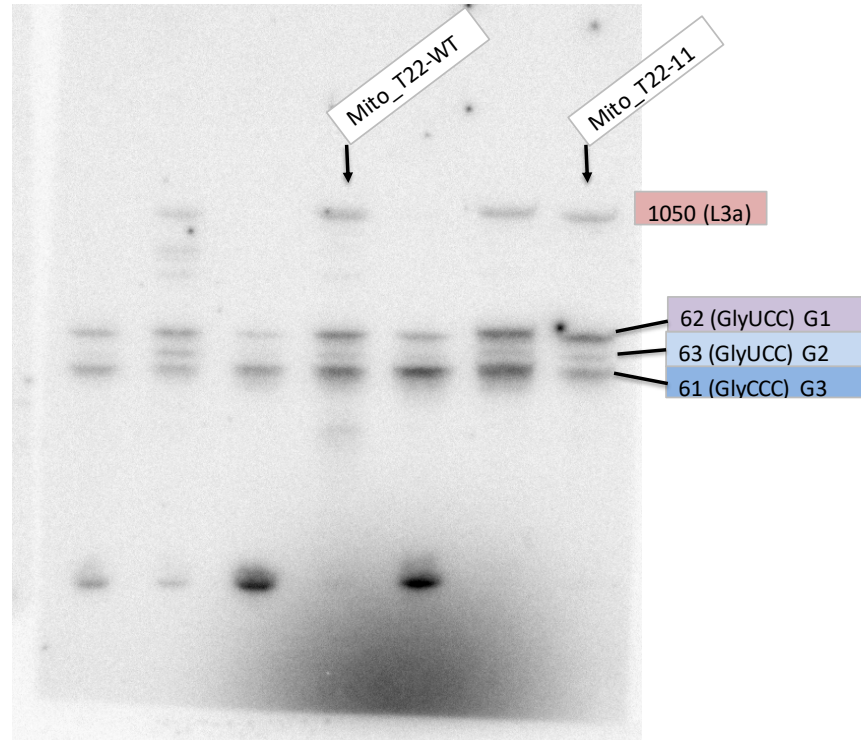

Probe\_884-BI.210611

| NO.      | Index | PSL    |      |
|----------|-------|--------|------|
| MtT22-WT | U1    | 226,7  | 1050 |
| MtT22-11 | U2    | 212,3  |      |
| MtT22-WT | U3    | 4006   | 884  |
| MtT22-11 | U4    | 4143,5 |      |

BI.21.6.11 sd884-2

|          | 884    | 1050  | sd/1050 |       | Log2  | %     |
|----------|--------|-------|---------|-------|-------|-------|
| MtT22-WT | 4006   | 226,7 | 17,671  | 1,000 | 0,000 | 100,0 |
| MtT22-11 | 4143,5 | 212,3 | 19,517  | 1,104 | 0,143 | 110,4 |

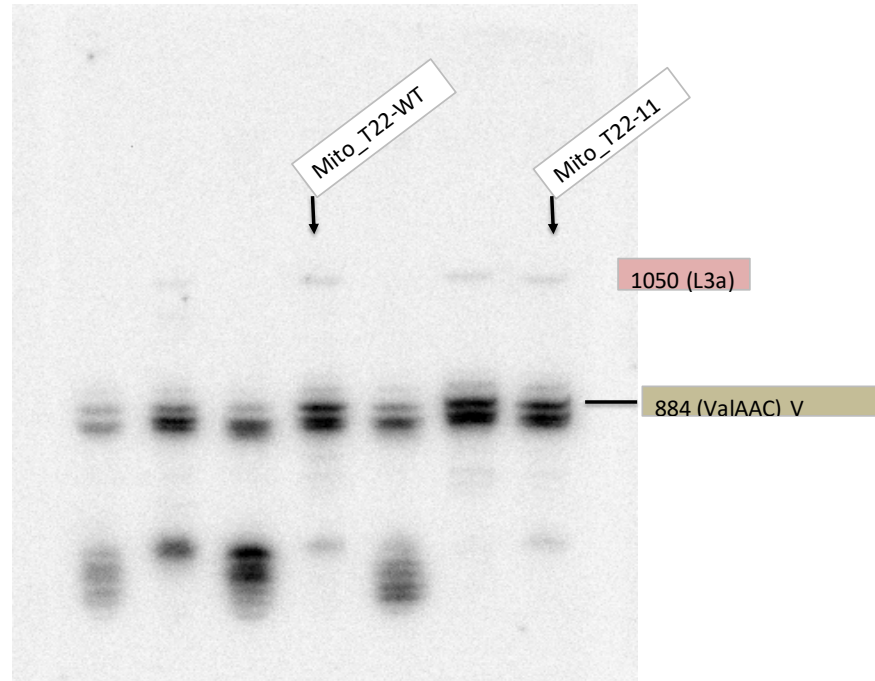

Results-BI.210611

| MtT22-11 | 62    | 831   | 61 | 63    | 884   | AV    | SD      |
|----------|-------|-------|----|-------|-------|-------|---------|
| 61       |       |       | 72 | 70,0  |       | 71,0  | 1,3     |
| 62       | 130,8 | 126,6 |    | 151,1 |       | 136,2 | 13,1    |
| 63       |       |       |    | 115,7 |       | 115,7 | #DIV/0! |
| 831      |       | 116,1 |    |       |       | 116,1 | #DIV/0! |
| 884      |       |       |    |       | 110,4 | 110,4 | #DIV/0! |

Probe\_832-BI.220611

| NO.      | Index | PSL     |
|----------|-------|---------|
| MtT22-WT | U2    | 928,91  |
| MtT22-11 | U3    | 1140,1  |
| MtT22-WT | U8    | 8822,55 |
| MtT22-11 | U9    | 9481,33 |

|          | 832    | 1050    | sd/1050 |       | Log2  | %     |
|----------|--------|---------|---------|-------|-------|-------|
| MtT22-WT | 928,91 | 8822,55 | 0,105   | 1,000 | 0,000 | 100,0 |
| MtT22-11 | 1140,1 | 9481,33 | 0,120   | 1,142 | 0,192 | 114,2 |

sd832 bl.22.6.11

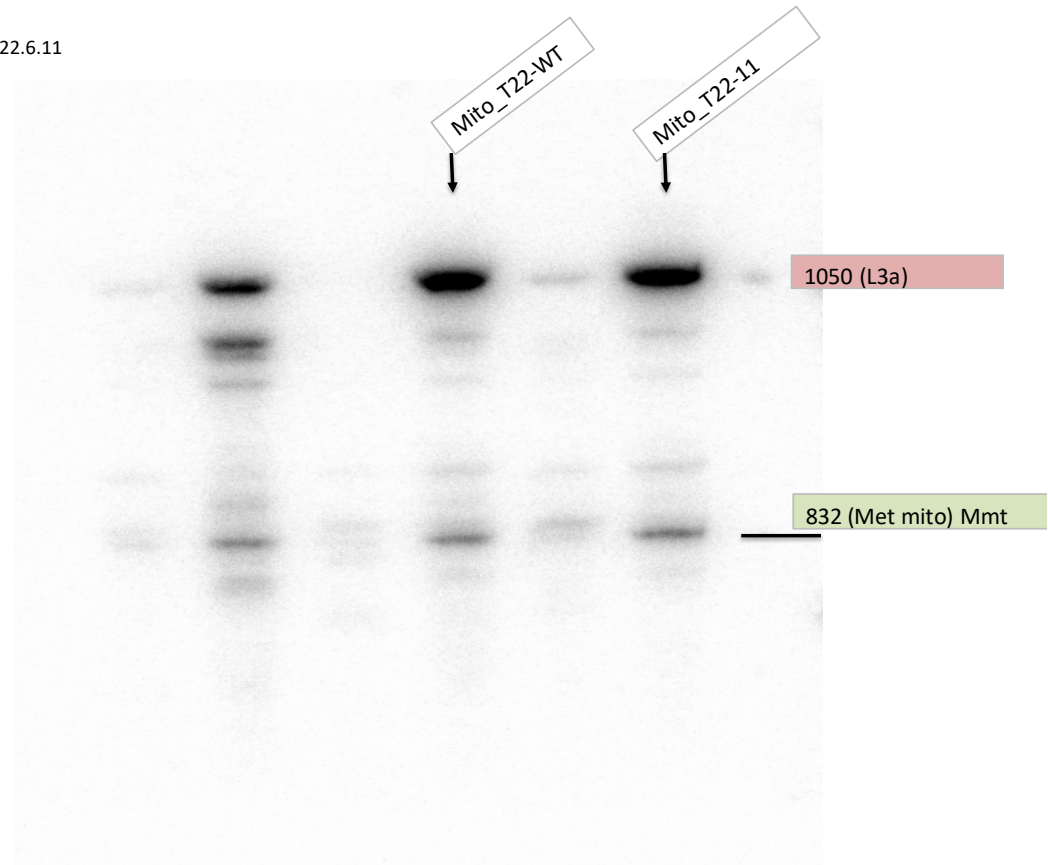

Probe\_62-BI.220611

| NO.      | Index | PSL      |
|----------|-------|----------|
| MtT22-WT | U2    | 6617,43  |
| MtT22-11 | U3    | 8150,25  |
| MtT22-WT | U8    | 12843,65 |
| MtT22-11 | U9    | 13334,44 |
| MtT22-WT | U14   | 1311,72  |
| MtT22-11 | U15   | 1398,04  |

|          | 62      | 1050     | sd/1050 |       | Log2  | %     |
|----------|---------|----------|---------|-------|-------|-------|
| MtT22-WT | 6617,43 | 12843,65 | 0,515   | 1,000 | 0,000 | 100,0 |
| MtT22-11 | 8150,25 | 13334,44 | 0,611   | 1,186 | 0,246 | 118,6 |

|          | 832     | 1050     | sd/1050 |       | Log2  | %     |
|----------|---------|----------|---------|-------|-------|-------|
| MtT22-WT | 1311,72 | 12843,65 | 0,102   | 1,000 | 0,000 | 100,0 |
| MtT22-11 | 1398,04 | 13334,44 | 0,105   | 1,027 | 0,038 | 102,7 |

sd62 bl.22.6.11

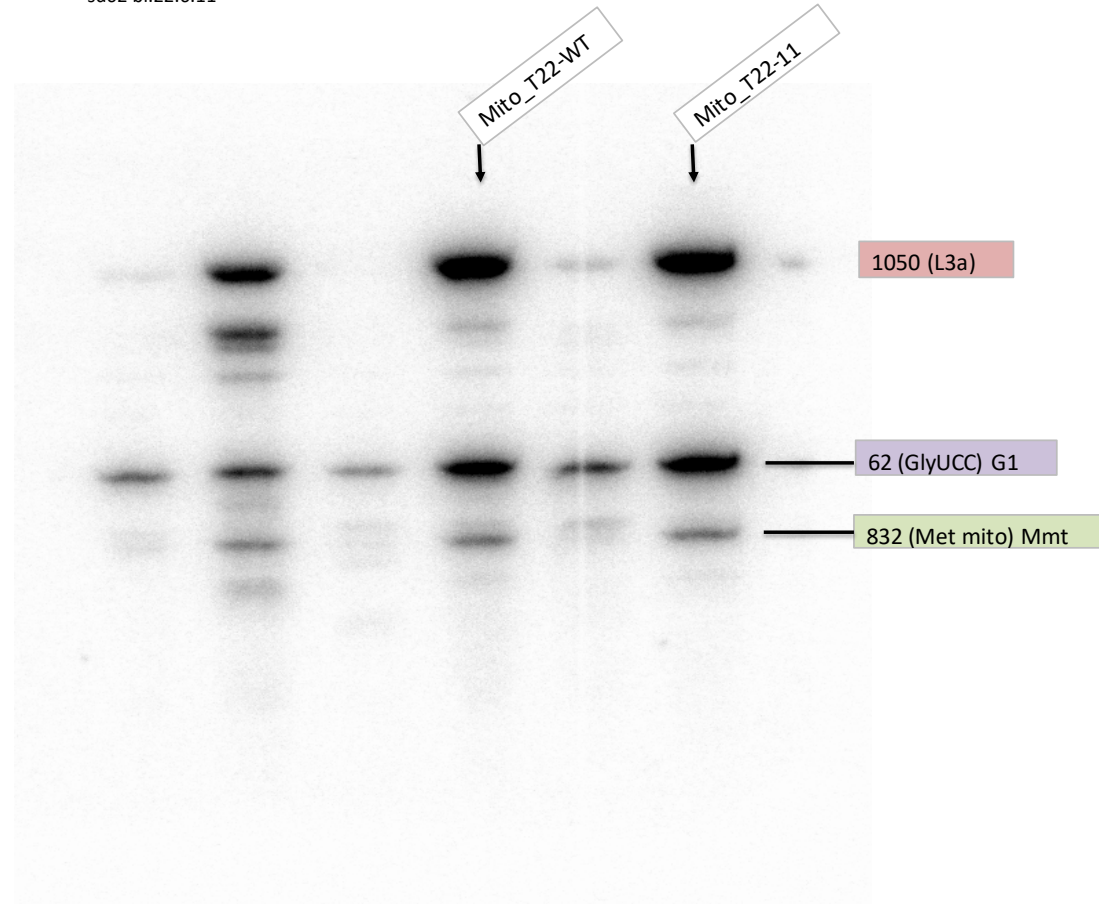

Probe\_61-BI.220611

| NO.      | Index | PSL    |      |
|----------|-------|--------|------|
| MtT22-WT | U1    | 605    | 1050 |
| MtT22-11 | U2    | 587,1  |      |
| MtT22-WT | U3    | 2287,5 | 61   |
| MtT22-11 | U4    | 1700,2 |      |
| MtT22-WT | U5    | 316,3  | 62   |
| MtT22-11 | U6    | 336,5  |      |

Bl. 22.6.11 sd61

|          | 61     | 1050  | sd/1050 |       | Log2   | %     |
|----------|--------|-------|---------|-------|--------|-------|
| MtT22-WT | 2287,5 | 605   | 3,781   | 1,000 | 0,000  | 100,0 |
| MtT22-11 | 1700,2 | 587,1 | 2,896   | 0,766 | -0,385 | 77    |

  

|          | 62    | 1050  | sd/1050 |       | Log2  | %     |
|----------|-------|-------|---------|-------|-------|-------|
| MtT22-WT | 316,3 | 605   | 0,523   | 1,000 | 0,000 | 100,0 |
| MtT22-11 | 336,5 | 587,1 | 0,573   | 1,096 | 0,133 | 109,6 |

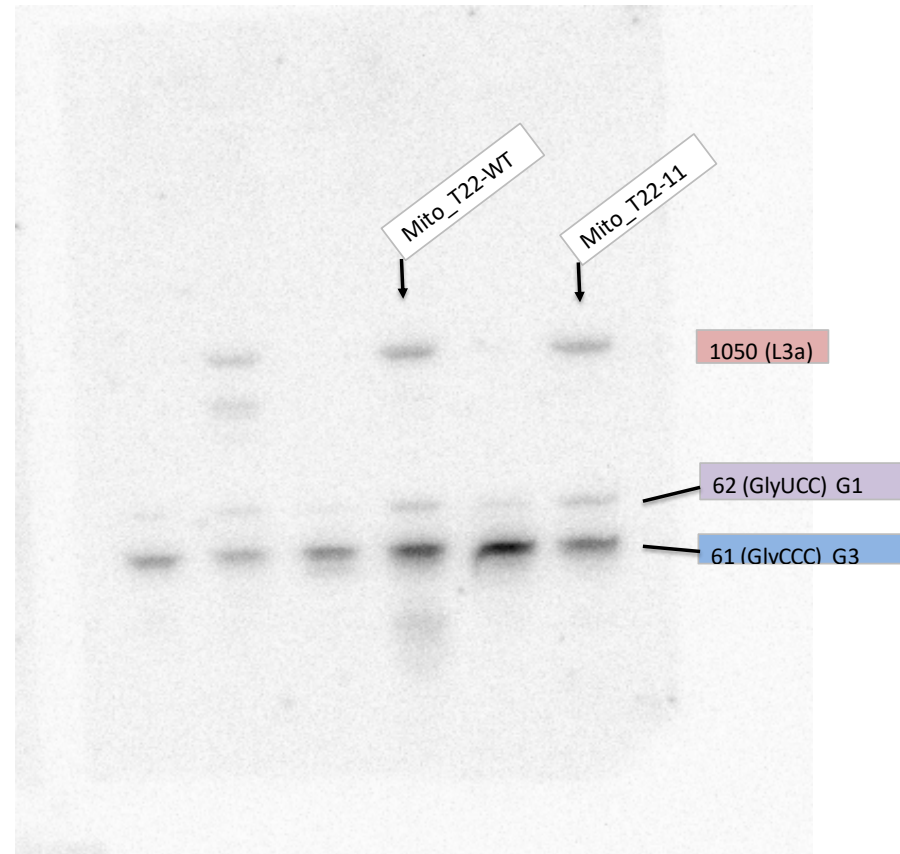



Probe\_63-BI.220611

| NO.      | Index | PSL    |      |
|----------|-------|--------|------|
| MtT22-WT | U1    | 622,1  | 1050 |
| MtT22-11 | U2    | 592    |      |
| MtT22-WT | U3    | 594    | 63   |
| MtT22-11 | U4    | 648    |      |
| MtT22-WT | U5    | 1596   | 62   |
| MtT22-11 | U6    | 1938   |      |
| MtT22-WT | U7    | 1642   | 61   |
| MtT22-11 | U8    | 1190,3 |      |

BI.22.6.11 sd63

|          | 63  | 1050  | sd/1050 |       | Log2  | %     |
|----------|-----|-------|---------|-------|-------|-------|
| MtT22-WT | 594 | 622,1 | 0,955   | 1,000 | 0,000 | 100,0 |
| MtT22-11 | 648 | 592   | 1,095   | 1,146 | 0,197 | 114,6 |

  

|          | 62   | 1050  | sd/1050 |       | Log2  | %     |
|----------|------|-------|---------|-------|-------|-------|
| MtT22-WT | 1596 | 622,1 | 2,566   | 1,000 | 0,000 | 100,0 |
| MtT22-11 | 1938 | 592   | 3,274   | 1,276 | 0,352 | 127,6 |

  

|          | 61     | 1050  | sd/1050 |       | Log2   | %     |
|----------|--------|-------|---------|-------|--------|-------|
| MtT22-WT | 1642   | 622,1 | 2,639   | 1,000 | 0,000  | 100,0 |
| MtT22-11 | 1190,3 | 592   | 2,011   | 0,762 | -0,393 | 76,2  |

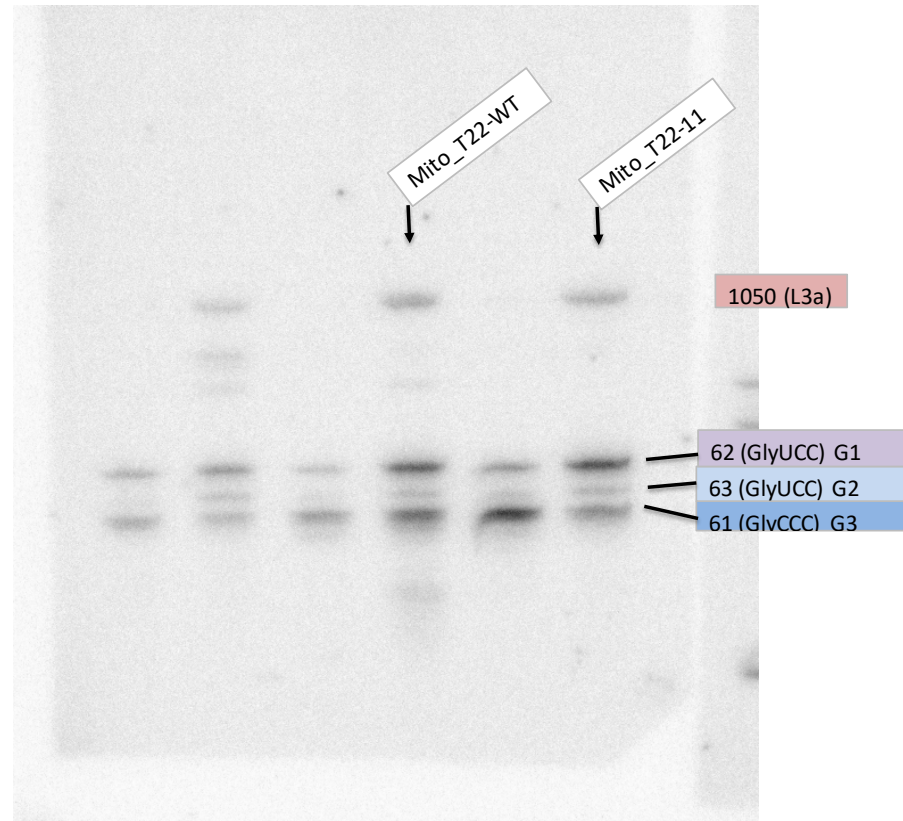

Results-BI.220611

| MtT22-11 | 832   | 62    | 61    | 63    | AV    | SD      |
|----------|-------|-------|-------|-------|-------|---------|
| 61       |       |       | 76,6  | 76,2  |       | 0,3     |
| 62       |       | 118,6 | 109,6 | 127,6 |       | 9,0     |
| 63       |       |       |       | 114,6 |       | #DIV/0! |
| 832      | 114,2 | 102,7 |       |       | 108,4 | 8,2     |

Sum up\_Fig5B

| Probe Name  | GlyGCC<br>62<br>G1 | GlyUCC<br>63<br>G2 | GlyCCC<br>61<br>G3 | ValAAC<br>884<br>V | Leu AAG<br>958<br>L | Met mt<br>832<br>Mmt | Gln mt<br>831<br>Qmt | L3a<br>1050 |
|-------------|--------------------|--------------------|--------------------|--------------------|---------------------|----------------------|----------------------|-------------|
| 21.6.2011   | 100                | 130,8              | 115,7              | 72                 | 110,4               |                      | 116,1                |             |
| 22.6.2011   | 100                | 118,6              | 114,6              | 77                 |                     | 114,2                |                      | 100,0       |
| 2.9.11      | 100                | 100,7              | 132,6              | 62,2               | 92,3                | 76,5                 | 101,4                | 95,5        |
| 8.9.11(1rs) | 100                |                    |                    | 115,60             | 95,45               |                      |                      | 100         |
| 8.9.11(3ms) | 100                |                    |                    | 92,83              | 77,51               | 115,10               | 85,30                | 100         |
| AV          | 117                | 121                | 70                 | 103                | 83                  | 110                  | 99                   | 100         |
| SD          | 15                 | 10                 | 8                  | 12                 | 11                  | 8                    | 16                   | 0           |
| TTEST       | 0,10               | 0,03               | 0,01               | 0,34               | 0,06                | 0,07                 | 0,46                 |             |
|             | G1                 | G2                 | G3                 | V                  | L                   | Mmt                  | Qmt                  |             |
|             | 117                | 121                | 70                 | 103                | 83                  | 110                  | 99                   |             |
|             | 15                 | 10                 | 8                  | 12                 | 11                  | 8                    | 16                   |             |

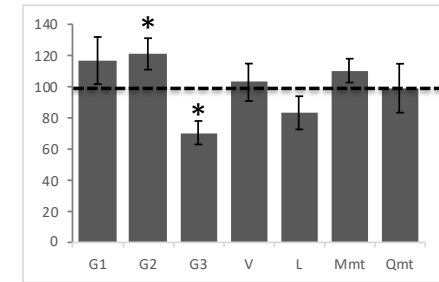

\* > 0,05
